# Supplementary material
Source: publisher site journal article supplement (https://www.dovepress.com/article/285714)
Supplement: Supplementary file 1 [file get_supplementary_file.php]

**Supplementary materials**

**Supplementary Fig. 1.** Representative agarose gel electrophoresis for mice genotyping using DNA isolated from tail snips. The first lane is a 100 bp DNA ladder. Wild-type (WT) mice (758 bp) are run as a control in the second lane. The third to fifteenth lanes represent miR-21 knockout (KO) mice (480 bp).

**Supplementary Fig. 2.** miR-21 KO mice were injected with AAV9-si-NC as control or AAV9-si-Spry1 through tail vein, and the efficiency of adenovirus transduction was quantified based on GFP positive cells (a: representative immunofluorescent image; b: quantitative analysis); ns = not significant vs miR-21+si-NC, n = 3 per group.
